# Supplementary material
Source: PubMed Central journal article supplement (PMC6497958)
Supplement: supp_RA118.006255_141303_2_supp_293473_pnmy5w.pdf [file supp_RA118.006255_141303_2_supp_293473_pnmy5w.pdf]

## Supplemental Figure legends:

Supplemental Figure 1. RT-qPCR results and locus-specific bisulfite sequencing data showed 1 h and 3 h TNF- $\alpha$  treatment can activate *IL-32* transcription in a DNA demethylation-independent manner in THP-1 (A) and HAP1 (B) cells.

Supplemental Figure 2. In HAP1 cells, *IL-32* basal transcription is upregulated after long-term TNF- $\alpha$  treatment and is accompanied by sustained hypomethylation at the promoter and CGI. A, RT-qPCR results showed that *IL-32* transcription can be efficiently activated by 12 d TNF- $\alpha$  treatment in HAP1 cells. Averages from two independent experiments are shown, and error bars represent standard deviation in the RT-qPCR results. B, *IL-32* basal expression level is upregulated after 12 d TNF- $\alpha$  treatment. Averages from two independent experiments are shown, and error bars represent standard deviation in the RT-qPCR results. C, Bisulfite sequencing data revealed that *IL-32* regulatory regions are demethylated by 12 d TNF- $\alpha$  treatment and the low methylation status can be sustained after TNF- $\alpha$  withdrawal in HAP1 cells.

Supplemental Figure 3. The sequence of mutant alleles in *TET1* KO, *TET2* KO and *TET3* KO HEK293 cells determined by Sanger sequencing. The exons encoding the catalytic cysteine-rich and DSBH domains are indicated. The red stars show the exons targeted by the CRISPR-Cas9 system to abrogate the activity of *TET* catalytic domain.

Supplemental Figure 4. *TET* TKO HEK293 cells. A, The sequences of mutant alleles in *TET* TKO HEK293 cells determined by Sanger sequencing. The exons encoding the catalytic cysteine-rich and DSBH domains are indicated. Red stars indicate the exons that are targeted by the CRISPR-Cas9 system to abrogate the activity of the *TET* catalytic domain. B, UHPLC-MRM MS/MS quantitation of 5mC and 5hmC in the genomic DNA extracted from HEK293 WT and *TET* TKO cells. 5hmC indicates 5-hydroxymethyl-2'-deoxycytidine and dC indicates 2'-deoxycytidine. SD represents standard deviation. C, FPKM value of *DNMT* genes in RNA-seq experiments are shown in WT and *TET* TKO cells.

Supplemental Figure 5. RT-qPCR data revealed that short-term and long-term TNF- $\alpha$  treatment can activate *IL-32* transcription in *TET1* KO, *TET2* KO, *TET3* KO and *TET* TKO cells. Averages from three independent experiments are shown and error bars represent standard deviation.

Supplemental Figure 6. *RELA* KO cells. A, Strategy for CRISPR-Cas9 system to knockout human *RELA* gene. B, Validation of *RELA* KO cells by PCR (primer sequence shown in Supplemental Table 4). C, Validation of *RELA* KO cells by Sanger sequencing. D, FAIRE assay results show increased chromatin accessibility at the *IL-32* promoter of 12 h TNF- $\alpha$  treated cells. The promoter of *ACTB* was used as a control to determine relative DNA recovery ratios. Error bars represent standard deviations from two biological replicates. qPCR primer sequences are shown in Supplemental Table 5.

Supplemental Figure 7. The upregulation of *IL-32* transcription after long-term TNF- $\alpha$  stimulation can be sustained independent of CREB and *IL-32* promoter CRE in HEK293 cells. A, Schematic representation of CRE (TGACGTCA) in *IL-32* promoter. B, The sequence of mutant alleles in *CREB1* KO HEK293 cells. The exons encoding the bZIP domain are indicated. The red star shows the exon targeted by the CRISPR-Cas9 system to abrogate DNA binding and dimerization. C, RT-qPCR data showed that *IL-32* transcription can still be induced in *CREB1* KO cells. D, RT-qPCR data revealed the upregulation of *IL-32* transcription through long-term TNF- $\alpha$  treatment in *CREB1* KO cells. E, Sanger sequencing of genomic DNA PCR product confirmed the *IL-32* promoter CRE mutated cells. F, RT-qPCR data showed the upregulation of *IL-32* transcription through long-term TNF- $\alpha$  treatment in *IL-32* promoter CRE mutated cells.

Supplemental Figure 8. HPLC-MRM MS/MS experiments at various time points following TNF- $\alpha$  treatment showed a subtle decline of global 5mC level.

# Supplemental Figure 1

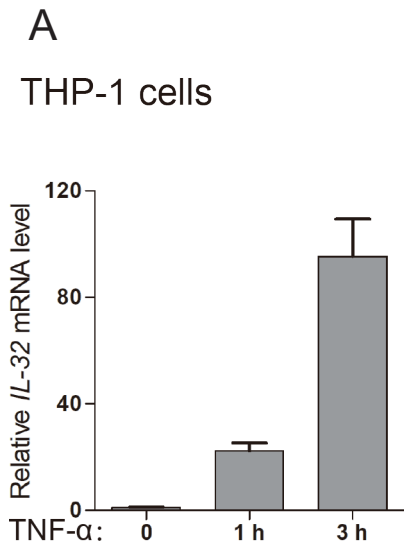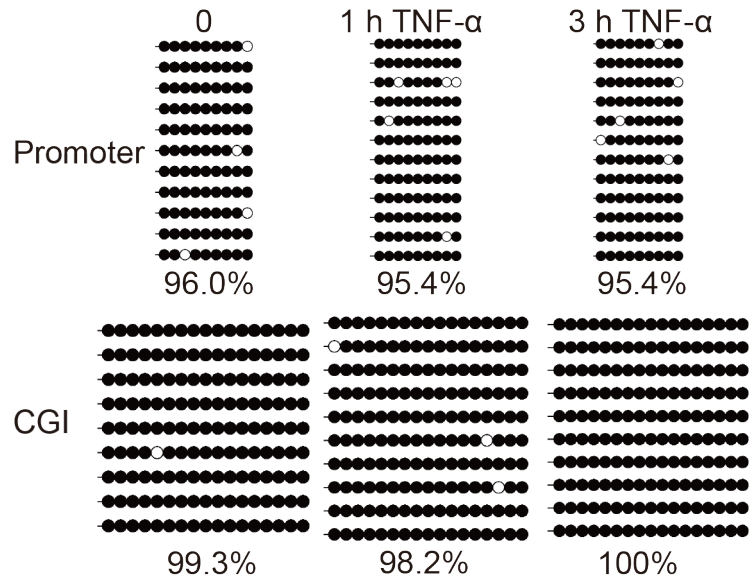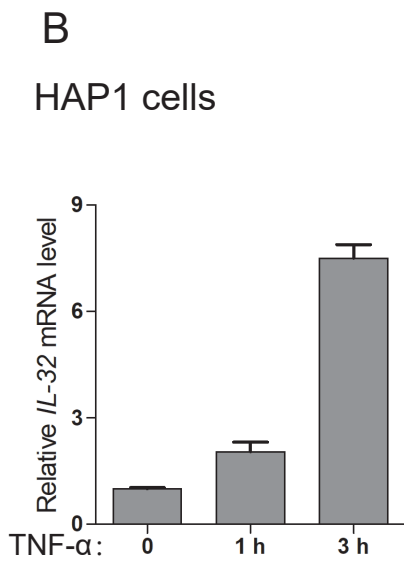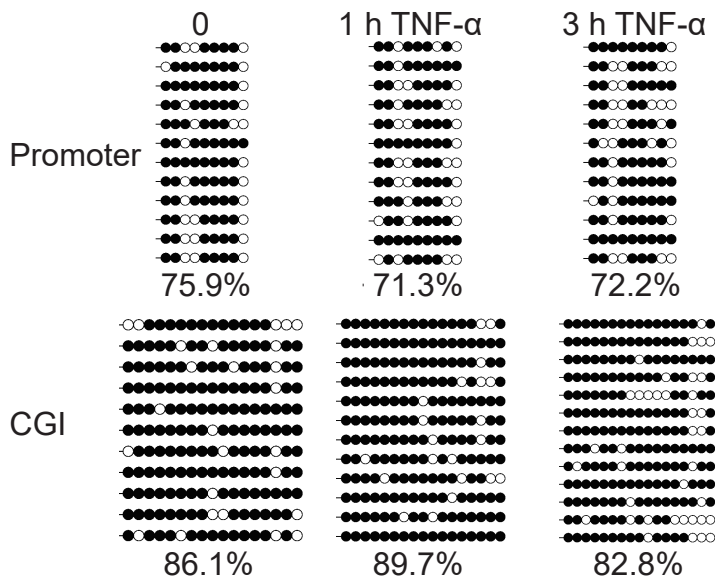

# Supplemental Figure 2

HAP1 cells

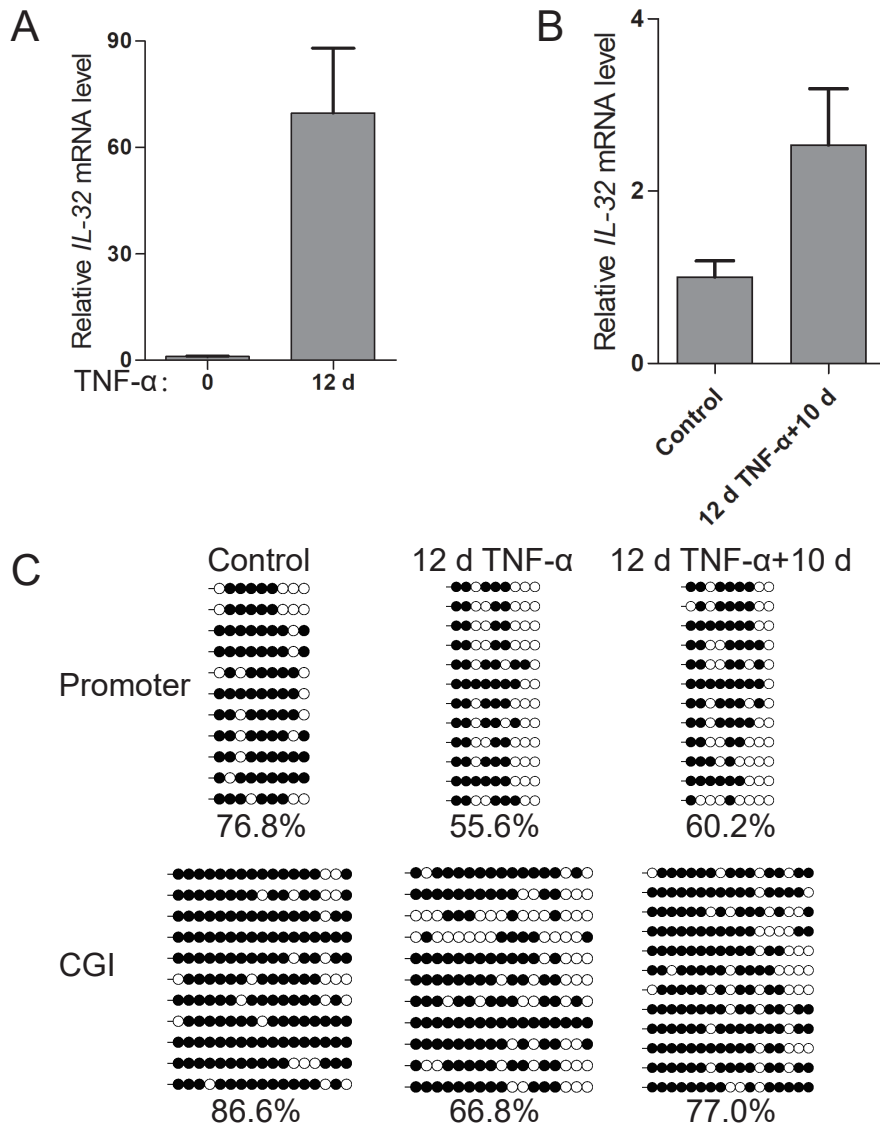

# Supplemental Figure 3

*TET1* KO cell

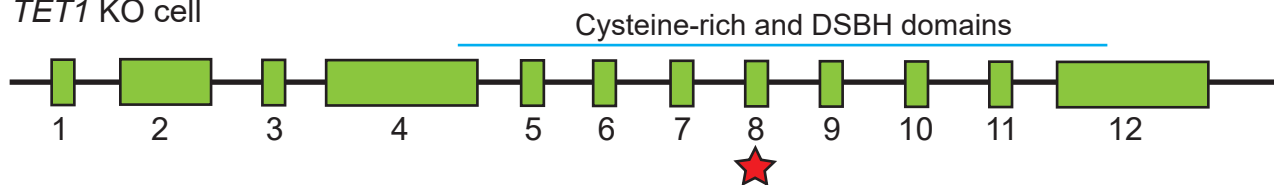

TGTC AAGGAATTGATCCAGAGACTTGTGGAGCTTCATTCTCTTTTGGCTGTTTCATGGAGT WT  
 TGTC AAGGAATTGATC-----GGAGCTTCATTCTCTTTTGGCTGTTTCATGGAGT -11bp  
 TGTC AAGGAATTGATCCAGAGAACTTGTGGAGCTTCATTCTCTTTTGGCTGTTTCATGGAGT +1bp

*TET2* KO cell

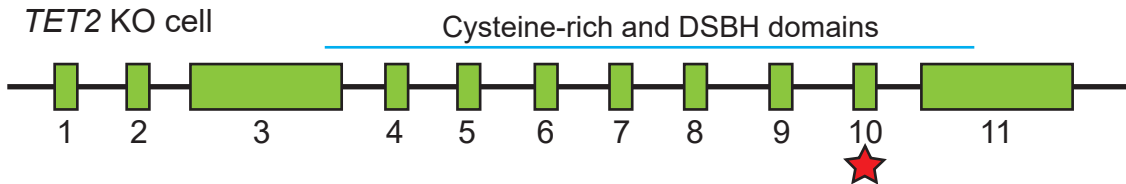

CTTCACGTTCTGCCTTTATACAAAGTCTCTGACGTGGATGAGTTTGGGAGTGTGGAAGCT WT  
 CTTCACGTTCTGCCTTTATACAAAGTCTCT-ACGTGGATGAGTTTGGGAGTGTGGAAGCT -1bp  
 CTTCACGTTCTGCCTTTATACAAAGTCTCTGGACGTGGATGAGTTTGGGAGTGTGGAAGCT +1bp

*TET3* KO cell

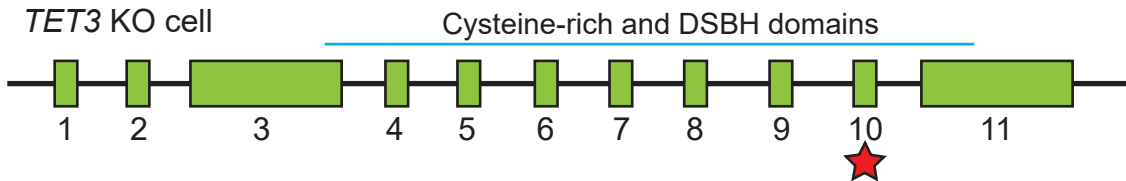

GTCTGCACCCTGACCAAGGAAGACAATCGCTGCGTGGGCAAGATTCCCGAGGATGAGCAG WT  
 GTCTGCACCCTGACCAAGGAAGACAATCGCT--GTGGGCAAGATTCCCGAGGATGAGCAG -2bp  
 GTCTGCACCCTGACCAAGGAAGACAATCGCTTTCGTGGGCAAGATTCCCGAGGATGAGCAG +2bp  
 GTCTGCACCCTGACCAAGGAAGACAATCGCTGGCGTGGGCAAGATTCCCGAGGATGAGCAG  
 TGGAGAAGCCTCCGGTCTGTACTTCGGTCTCGTGGGCAAGATTCCCGAGGATGAGCAG +77bp  
 GTCTGCACCCTGACCAAGGAAGACAATCGCTGCGACAGGACTATAAAGATACCAGGCGTTTCCCCTGGAAGCTCCCTC  
 GTGGCGTCTCCTGTTCCGACCCTGCCCGTGGGCAAGATTCCCGAGGATGAGCAG +73bp

★ Exons targeted by CRISPR-Cas9 system

# Supplemental Figure 4

## A *TET* TKO cell

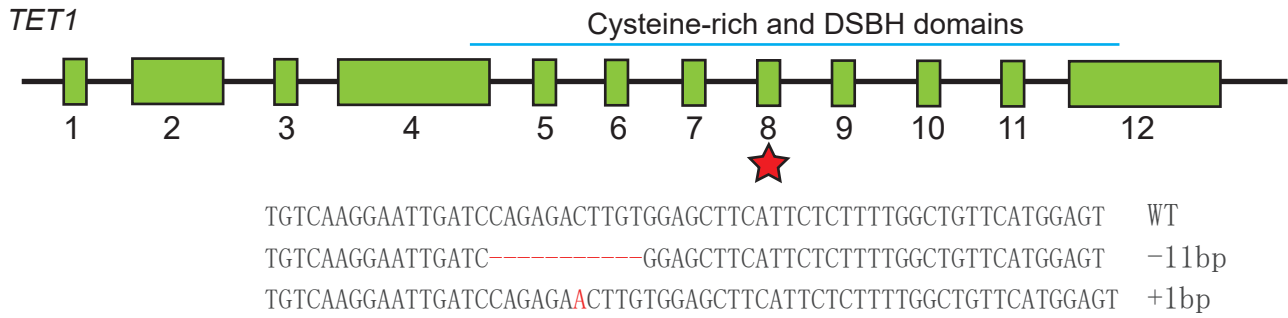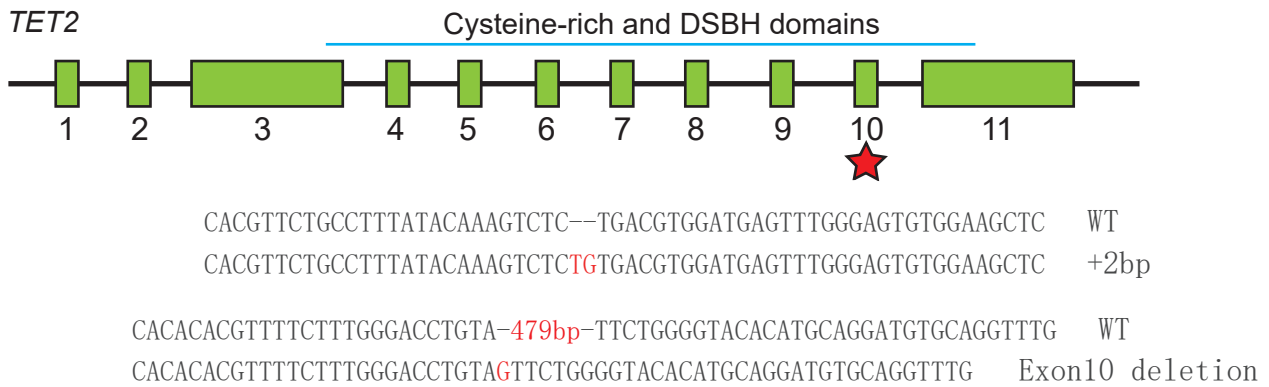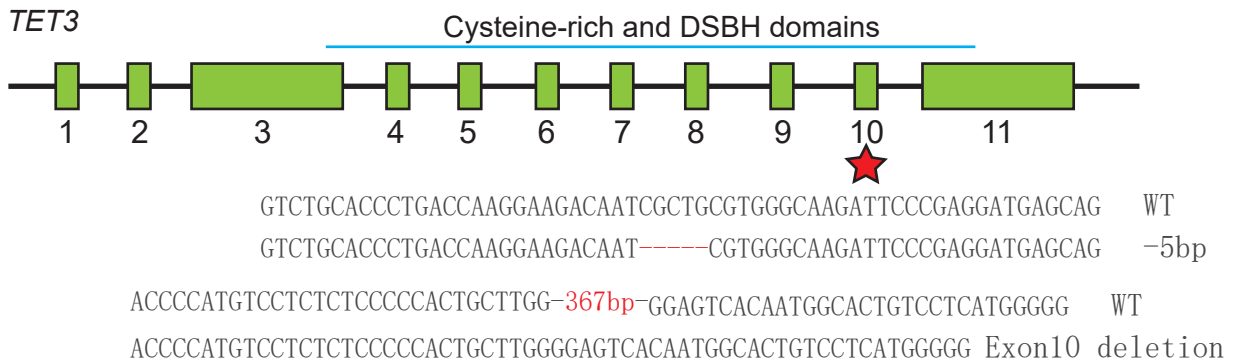

★ Exons targeted by CRISPR-Cas9 system

**B**

| Sample         | 5mdC/10 <sup>2</sup> dC | SD   | 5hmdC/10 <sup>6</sup> dC | SD   |
|----------------|-------------------------|------|--------------------------|------|
| WT             | 2.35                    | 0.02 | 22.23                    | 0.23 |
| <i>TET</i> TKO | 2.60                    | 0.03 | Not Detected             |      |

**C**

|               | WT<br>(repeat 1) | WT<br>(repeat 2) | <i>TET</i> TKO<br>(repeat 1) | <i>TET</i> TKO<br>(repeat 2) |
|---------------|------------------|------------------|------------------------------|------------------------------|
| <i>DNMT1</i>  | 96.6             | 82.8             | 94.3                         | 98.1                         |
| <i>DNMT3A</i> | 4.11             | 3.63             | 4.53                         | 5.08                         |
| <i>DNMT3B</i> | 7.39             | 5.85             | 3.89                         | 4.16                         |

# Supplemental Figure 5

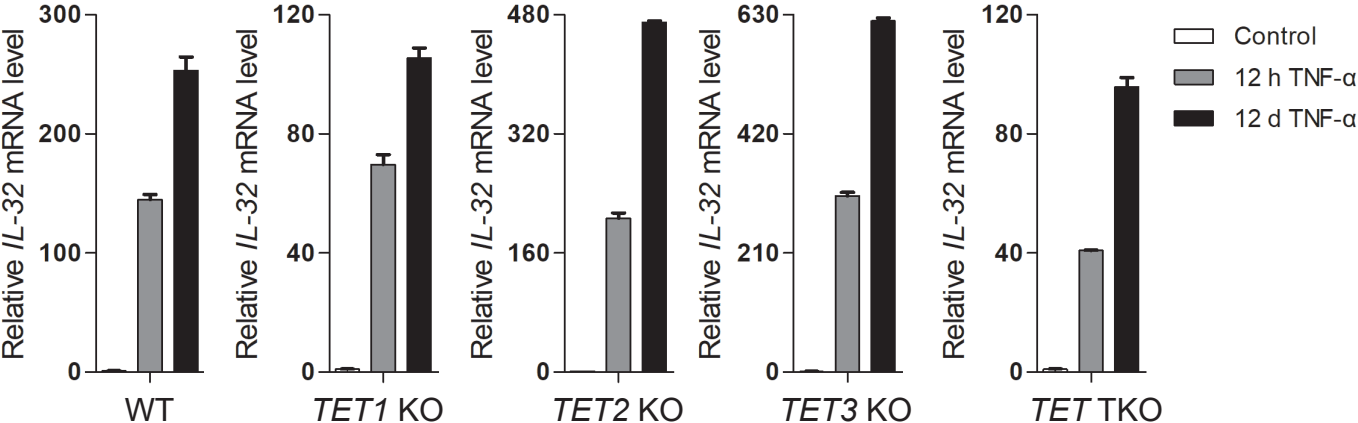

# Supplemental Figure 6

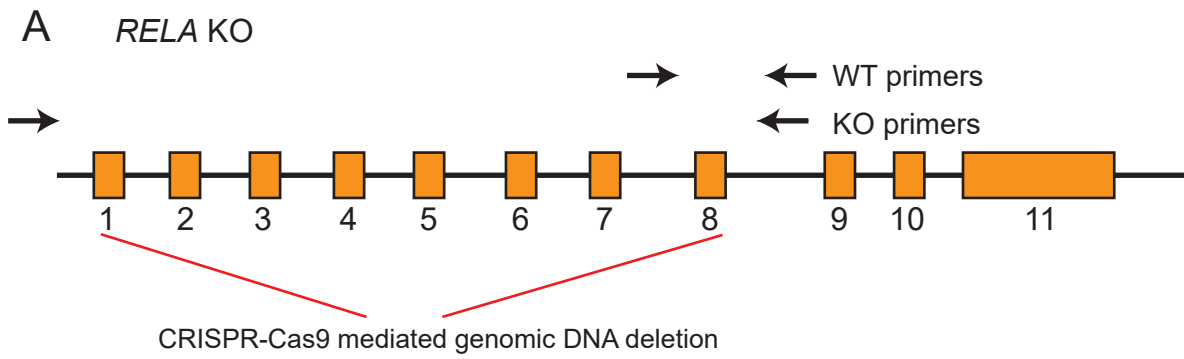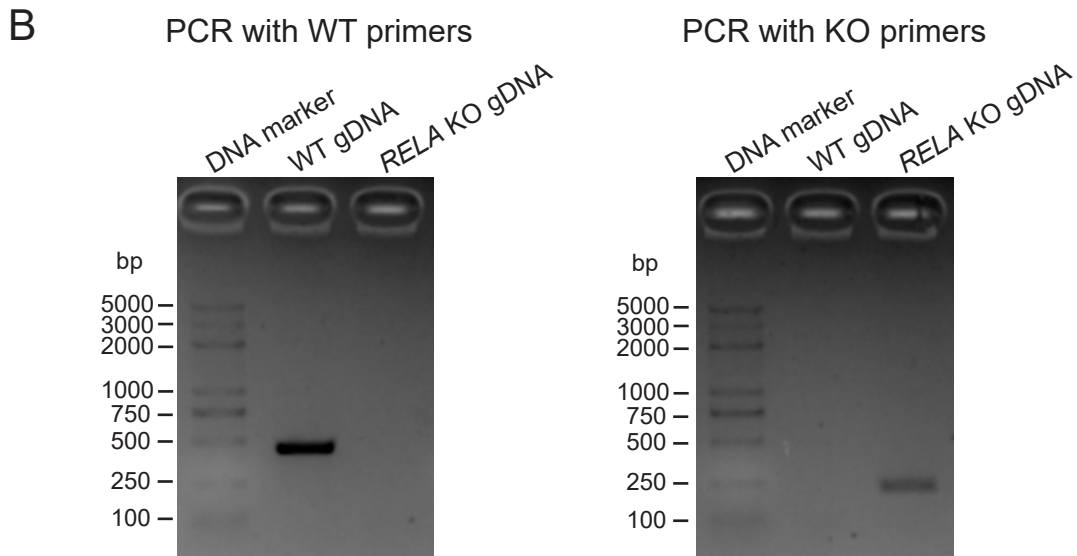

**C**

GGCCGGATTCCGGGCAGTGACGCGA-4640bp-AGATACAGGTACACAGCTGGGGTGG    WT  
GGCCGGATTCCGGGCAGTGACGCGAAGATACAGGTACACAGCTGGGGTGG      *RELA* KO

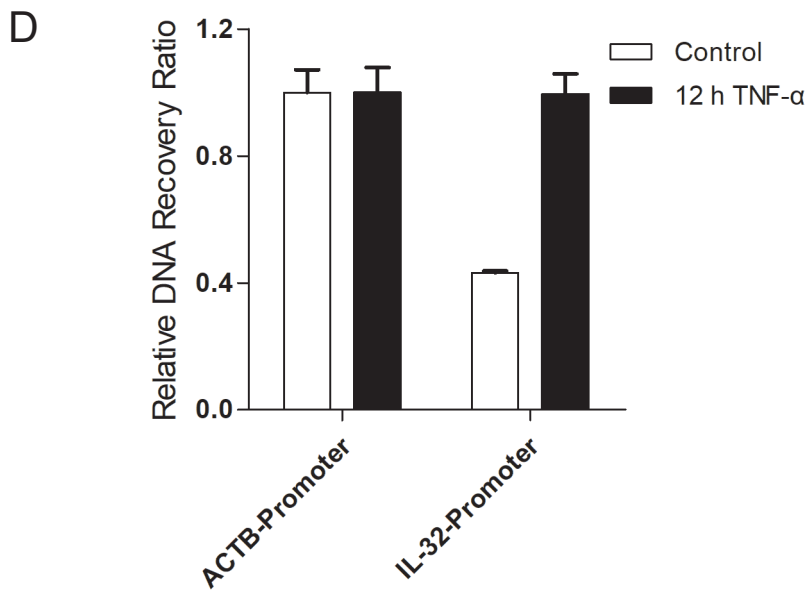



# Supplemental Figure 7

A

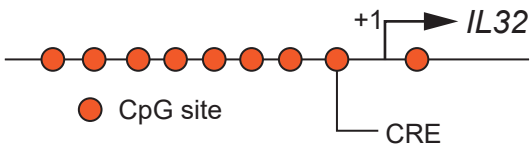

B

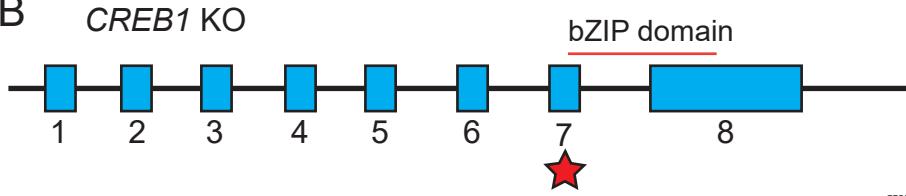

GGCATCCTCCCCAGCACTTCTACACAGCCTGCTGAAGAAGCAGCACGAAAGAGAGAGGT WT  
 GGCATCCTCCCCAGCACTTCTACACAGCCTG--GAAGAAGCAGCACGAAAGAGAGAGGT -2bp  
 GGCATCCTCCCCAGCACTTCTACACAGCCTGCTTGAAGAAGCAGCACGAAAGAGAGAGGT +1bp

★ Exons targeted by CRISPR-Cas9 system

C

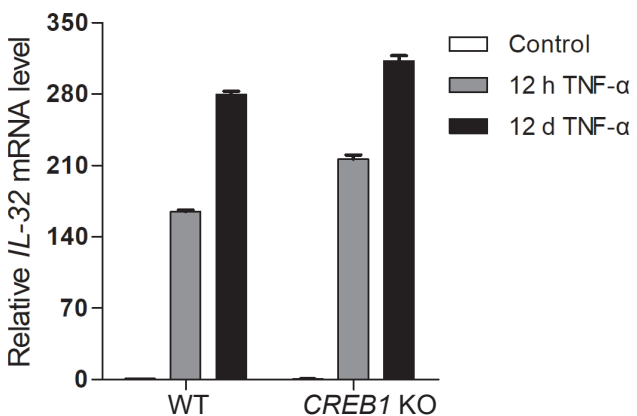

D

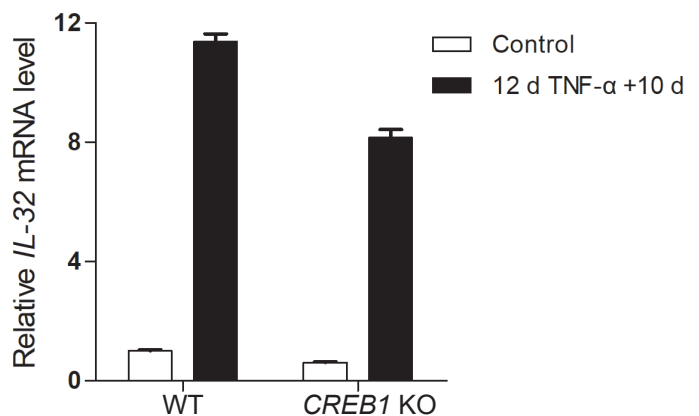

E

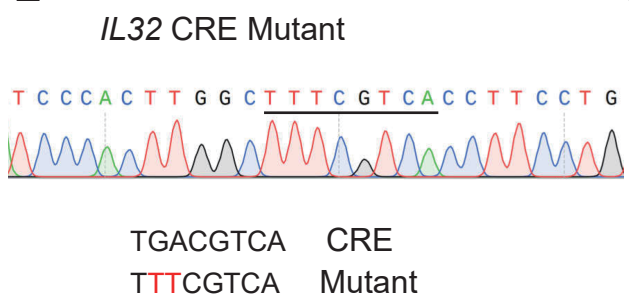

F

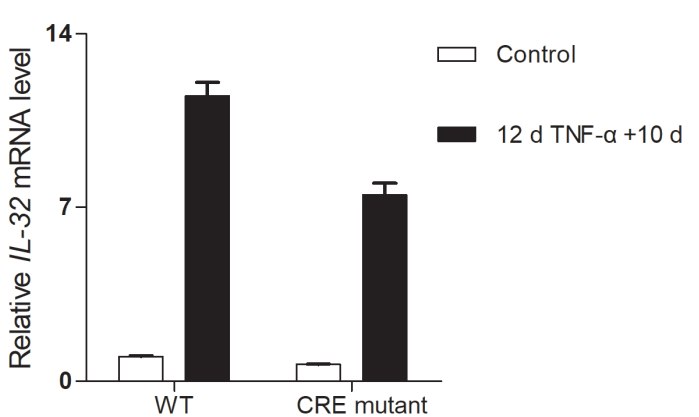

# Supplemental Figure 8

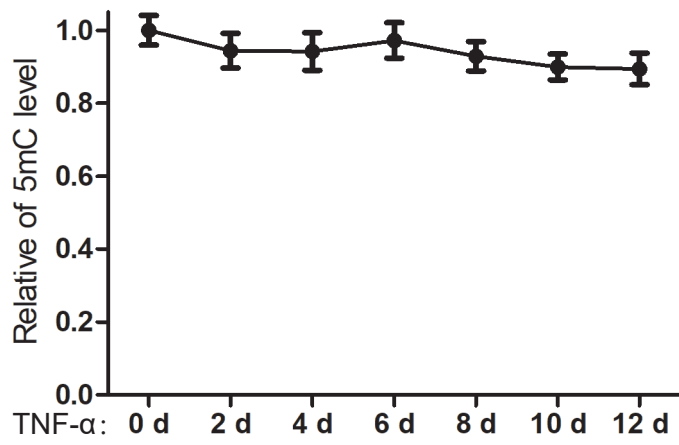

Supplemental Tables

Supplemental Table 1: *IL-32* promoter and CpG island genomic sequence for methylation analysis.

|                       | Sequence (5' to 3')                                                                                                                                                                                                                                                                                                                                                                                                                                                                                                                                                    |
|-----------------------|------------------------------------------------------------------------------------------------------------------------------------------------------------------------------------------------------------------------------------------------------------------------------------------------------------------------------------------------------------------------------------------------------------------------------------------------------------------------------------------------------------------------------------------------------------------------|
| <i>IL-32</i> promoter | CGGCCCCAGATGGCCTTGCCTTGGCCCAGAAGGGTCAG<br>AAGGACCTGGTCAGCCAAGCTCAGACAGCCGGCAGGAT<br>GCCTTCCACCCTGCAGAGGGTCCTATCTTGTCCCACAGG<br>TAGATCTACATCACCCTAGCCACCCCTCCAACGTGCAC<br>AGGCCCCTGCCCTCACGGCGCCCCTCTTAGGTCCGGCAG<br>TTCTGCCTCCTTCTGATCCAGAAGTTTCTCTGGCCTCTG<br>GAGCCGGGGCACACCTCATGCAAGGACAGGGTCCAAAT<br>TCCTTTGTCCTTGGATCCCCTTGGCTGACGTCACCTTCC<br>TGTACTCAGGGAGTTTCCCCAGCCAGCTGTCCCGAGTCT<br>GGACTTTCCTCTGCCCCTCCCCACTCTCAGGCTGGTGG<br>GGTGGGGAAAGCAGCCATTCTGGGCTCAGAGACTCC<br>CACCCAGCTCAGAGGGAGCAGGGGCCAGCCAGGGAC<br>GGACCCTCATTCTCCAGGGACCCAGACCTCTGTCTC<br>TCTCG |
| <i>IL-32</i> CGI      | CGCCAGCAGGCCTTGGCTCCTTGAACCTTTTGGCCGCCAT<br>GTGCTTCCC GAAGGTGAGTGAGAGGCTGCGTGTGCTTTT<br>GTGGGCATGTCTGAAAACAGACCGTAAGGGTGCGGGTG<br>CCCTCAGTATTTCCCAGAGGTGCCTGTGTGTCAGGGCTCA<br>GTCAGGGGCACCCAGCGGCAGGAGGATAGTGATGGGGT<br>GAGAGTGTCAGTGGAGGCGCTGGAGGTCATATGTGTCGG<br>GGGCGCTGGAGAACGGCAGGGGTGTGGATGAGAGGGA<br>GCACCTGTCCCAGGAGCCCTTACAGCCCGAAAGCCC<br>GGGGCAGGGGTGGGGCAGGGCTCTGCTGGAAACGACTC<br>GGAGAATGCTTCTCTCAGAGGCCG                                                                                                                                                 |

Supplemental Table 2: *IL-32* promoter and CGI nested PCR primers for methylation analysis

| Primer name                         | Sequence                   |
|-------------------------------------|----------------------------|
| <i>IL-32</i> -promoter-first PCR-F  | TTAGTTAGGTTGGAGGGTTAGAATT  |
| <i>IL-32</i> -promoter-first PCR-R  | TCAAAACAAAAACCTTACTAAATA   |
| <i>IL-32</i> -promoter-second PCR-F | GGGGAGTTTTTAAGATTGTTGAGATT |
| <i>IL-32</i> -promoter-second PCR-R | AAACAAACAAAAATAAAAACTTACC  |
| <i>IL-32</i> -CGI-first PCR-F       | GAGGATTTTTTGGGGAGGAGGGTGT  |
| <i>IL-32</i> -CGI-first PCR-R       | AACACCAAAACCCACACAAACCTTA  |
| <i>IL-32</i> -CGI-second PCR-F      | TGAGATATTTTTTTTTTTTATATT   |
| <i>IL-32</i> -CGI-second PCR-R      | TACTCTTAAACCCACCCAATAAAC   |

**Supplemental Table 3: gRNA sequence used for CRISPR-Cas9 system mediated genome editing**

| Cell line                           | gRNA sequence                                | Target                                                     |
|-------------------------------------|----------------------------------------------|------------------------------------------------------------|
| <i>TET1</i> KO cells                | AATGAAGCTCCACAAGTCTC                         | Frameshift mutation in <i>TET1</i> exon 8                  |
| <i>TET2</i> KO cells                | TTTATACAAAGTCTCTGACG                         | Frameshift mutation in <i>TET2</i> exon 10                 |
| <i>TET3</i> KO cells                | AAGGAAGACAATCGCTGCGT                         | Frameshift mutation in <i>TET3</i> exon 10                 |
| <i>CREB1</i> KO cells               | TTTCGTGCTGCTTCTTCAGC                         | Frameshift mutation in <i>CREB1</i> exon 7                 |
| <i>IL-32</i> promoter<br>CRE mutant | GGAAGGTGACGTCAGCCAAG<br>TCCGGGCAGTGACGCGACGG | Homology-directed repair to edit <i>IL-32</i> promoter CRE |
| <i>RELA</i> KO cells                | GCTGTGTACCTGTATCTGGC                         | Deletion of <i>RELA</i> exon 1~8                           |
|                                     | AATGAAGCTCCACAAGTCTC                         | Frameshift mutation in <i>TET1</i> exon 8                  |
|                                     | TTTATACAAAGTCTCTGACG                         | Frameshift mutation in <i>TET2</i> exon 10                 |
|                                     | GACATTACAGCCTCAACTAC                         |                                                            |
|                                     | CCCCATCAACTTGTAAGTTC                         | Deletion of <i>TET2</i> exon 10                            |
|                                     | AAGGAAGACAATCGCTGCGT                         | Frameshift mutation in <i>TET3</i> exon 10                 |
|                                     | TCTCCCCCACTGCTTGGGGC                         |                                                            |
| <i>TET</i> KO cells                 | AGTGCCATTGTGACTCCAAG                         | Deletion of <i>TET3</i> exon 10                            |

**Supplemental Table 4: PCR primers for *RELA* KO cells validation**

| Primer name             | Sequence              |
|-------------------------|-----------------------|
| <i>RELA</i> WT Primer-F | CACCGCATCTCCTGCAGAGG  |
| <i>RELA</i> WT Primer-R | CAGTGAAGTGCCTGGAATAG  |
| <i>RELA</i> KO Primer-F | TGTGCGTGCAGCCTCTTCGTC |
| <i>RELA</i> KO Primer-R | TCTGACTCCAGCTTCTGGCC  |

**Supplemental Table 5: qPCR primers for FAIRE assay**

| Primer name              | Sequence             |
|--------------------------|----------------------|
| <i>ACTB</i> -Promoter-F  | AAAGGCAACTTTCGGAACGG |
| <i>ACTB</i> -Promoter-R  | TTCCTCAATCTCGCTCTCGC |
| <i>IL-32</i> -Promoter-F | TGTCCTTGGATCCCACTTGG |
| <i>IL-32</i> -Promoter-R | CAGAGGGAAAGTCCAGACTC |
